1       **The epithelial-mesenchymal transcription factor *SNAI1* represses transcription of the**  
2       **tumor suppressor miRNA *let-7* in cancer**

3  
4  
5  
6  
7  
8  
9       Wang H<sup>1</sup>, Chirshev E<sup>1</sup>, Hojo N<sup>1^</sup>, Suzuki T<sup>1</sup>, Bertucci A<sup>1</sup>, Pierce M<sup>2</sup>, Perry C<sup>1</sup>, Wang R<sup>3</sup>, Zink J<sup>3</sup>,  
10       Glackin CA<sup>4</sup>, Ioffe YJ<sup>5</sup>, Unternaehrer JJ<sup>1,6</sup>

11  
12  
13  
14  
15  
16       <sup>1</sup>Division of Biochemistry, Department of Basic Sciences, Loma Linda University, Loma Linda,  
17       CA, USA

18       <sup>2</sup>Department of Biology, California State University San Bernardino

19       <sup>3</sup>Department of Chemistry and Biochemistry, University of California, Los Angeles, CA, USA

20       <sup>4</sup>Beckman Research Institute, City of Hope, Duarte, CA, USA

21       <sup>5</sup>Division of Gynecologic Oncology, Department of Obstetrics and Gynecology, Loma Linda  
22       University Medical Center, Loma Linda, CA, USA

23       <sup>6</sup>Center for Health Disparities and Molecular Medicine, Loma Linda University, Loma Linda, CA,  
24       USA

25       <sup>^</sup>Present address: Laboratory for Prediction of Cell Systems Dynamics, RIKEN, Osaka 565-0874, Japan

26  
27       **Corresponding author:**

28       Juli Unternaehrer, Ph.D.

29       Assistant Professor

30       Department of Basic Sciences

31       Division of Biochemistry

32       Loma Linda University School of Medicine

33       11085 Campus Street

34       Mortensen Hall 219

35       Loma Linda, CA 92354

36       Phone: (909) 558-7691; Fax: (909) 558-4887

37       junternaehrer@llu.edu

38  
39       **Running title:**

40       *SNAI1* represses *let-7*

41  
42       **Keywords:** epithelial-mesenchymal transition, stem cells, ovarian cancer, transcriptional  
43       regulation, miRNA, orthotopic patient-derived xenografts

44  
45  
46  
47  
48  
49  
50  
51

52 **List of abbreviations used:**

53 CSC: Cancer stem-like cells; ChIP: chromatin immunoprecipitation; DsiRNA: Dicer substrate  
54 small inhibitory RNA; EGF: Epidermal growth factor; EMT: Epithelial-mesenchymal transition;  
55 HA: hyaluronic acid; HGSOc: High grade serous ovarian carcinoma; IP: Immunoprecipitation;  
56 LLU: Loma Linda University; MSN: Mesoporous silica nanoparticles; PEI: polyethylenimine;  
57 PDX: Patient-derived xenograft; RT-qPCR: Reverse-transcription quantitative PCR; TGFB1:  
58 Transforming growth factor beta-1.

59

60

61 **Appropriate article category:**

62 Research Articles

63 Molecular Cancer Biology

64

65

66 **Novelty and Impact**

67

68 This study provides new insight into molecular mechanisms by which EMT transcription factor  
69 *SNAI1* exerts its pro-stemness effects in cancer cells, demonstrating its potential as a stem cell-  
70 directed target for therapy. *In vitro* and *in vivo*, mesoporous silica nanoparticle-mediated *SNAI1*  
71 knockdown resulted in restoration of let-7 miRNA, inhibiting stemness and reducing tumor  
72 burden. Our studies validate *in vivo* nanoparticle-delivered RNAi targeting the *SNAI1/let-7* axis  
73 as a clinically relevant approach.

74

75

76

77

78

79

80

81

82

83

84

85

86 **Abstract:**

87 We aimed to determine the mechanism of epithelial-mesenchymal transition (EMT)-induced  
88 stemness in cancer cells. Cancer relapse and metastasis are caused by rare stem-like cells  
89 within tumors. Studies of stem cell reprogramming have linked *let-7* repression and acquisition  
90 of stemness with the EMT factor, *SNAI1*. The mechanisms for the loss of *let-7* in cancer cells  
91 are incompletely understood. In four carcinoma cell lines from breast cancer, pancreatic cancer  
92 and ovarian cancer and in ovarian cancer patient-derived cells, we analyzed stem cell  
93 phenotype and tumor growth via mRNA, miRNA, and protein expression, spheroid formation,  
94 and growth in patient-derived xenografts. We show that treatment with EMT-promoting growth  
95 factors or *SNAI1* overexpression increased stemness and reduced *let-7* expression, while  
96 *SNAI1* knockdown reduced stemness and restored *let-7* expression. Rescue experiments  
97 demonstrate that the pro-stemness effects of *SNAI1* are mediated via *let-7*. *In vivo*,  
98 nanoparticle-delivered siRNA successfully knocked down *SNAI1* in orthotopic patient-derived  
99 xenografts, accompanied by reduced stemness and increased *let-7* expression, and reduced  
100 tumor burden. Chromatin immunoprecipitation demonstrated that *SNAI1* binds the promoters of  
101 various *let-7* family members, and luciferase assays revealed that *SNAI1* represses *let-7*  
102 transcription. In conclusion, the *SNAI1/let-7* axis is an important component of stemness  
103 pathways in cancer cells, and this study provides a rationale for future work examining this axis  
104 as a potential target for cancer stem cell-specific therapies.

105

106

107

108

109

110

111

112

113

114

115

116

117

118

119

120 **Introduction:**

121 Cancer stem-like cells (CSC) are the subpopulation of tumor cells responsible for long-term  
122 maintenance of tumors. These cells are capable of self-renewal and differentiation, making  
123 them an important contributor to tumor recurrence<sup>1</sup>. The origin of CSC is not completely  
124 understood. In some cancers, normal tissue stem cells appear to be altered to result in CSC<sup>1-4</sup>,  
125 while in others, somatic cells appear to be reprogrammed to the stem cell fate<sup>5-7</sup>. Whether the  
126 cells of origin in carcinomas are tissue resident stem cells or reprogrammed somatic cells, some  
127 aspects of the process by which CSC attain stem cell features are comparable to somatic cell  
128 reprogramming<sup>4,7-9</sup>. In somatic cell reprogramming, cells lose their differentiated characteristics  
129 and take on an embryonic or stem cell phenotype. Similarly, stem cells in tumors dedifferentiate  
130 and express genes consistent with the oncofetal state<sup>10-12</sup>.

131  
132 An important factor in maintenance of the differentiated state is the tumor suppressor miRNA  
133 *let-7*. *Let-7*, consisting in humans of nine highly conserved members in eight chromosomal  
134 locations, plays crucial roles in differentiation<sup>13</sup>. Because the seed sequence of the individual  
135 family members is identical, and the remaining sequence is different at only 1-3 residues, this  
136 miRNA family is generally presented as having redundant roles<sup>13</sup>. In pluripotent cells and germ  
137 cells, miRNA *let-7* expression is low, while differentiated cells uniformly express high levels<sup>14</sup>.  
138 Factors required for stemness (a property referring to a cell's ability to self-renew and  
139 differentiate<sup>3</sup>) are inhibited by *let-7*<sup>15</sup>. Loss of *let-7* is thus necessary for the stem cell state,  
140 either in reprogramming or in cancer<sup>13,16,17</sup>. *Let-7* represses a set of embryonic genes and  
141 oncogenes, and its loss allows upregulation of those genes, resulting in the oncofetal state<sup>13-16</sup>.  
142 Replacing *let-7* reduces the stem cell population and reduces resistance to chemotherapy<sup>18</sup>.  
143 These data strongly implicate *let-7* as a key regulator of the CSC phenotype.

144  
145 *Let-7* is frequently reduced in many types of cancer<sup>13</sup>. *Let-7* loss correlates with poor prognosis,  
146 and is a biomarker for less differentiated cancer<sup>13,19</sup>, and predicts tumor growth and  
147 metastasis<sup>20</sup>. Mechanisms for its loss are incompletely understood. miRNAs are regulated  
148 transcriptionally, epigenetically, and post-transcriptionally<sup>21</sup>. The pluripotency-associated factor  
149 *LIN28A* blocks *let-7* biogenesis by inhibiting its processing to the mature form, but *LIN28A* is  
150 absent in differentiated cells<sup>22</sup>. Several factors have been shown to regulate *let-7* transcription,  
151 including the epithelial-mesenchymal transition (EMT) transcription factor TWIST1, TP53, MYC,  
152 BMI1, NFKB1, and CEBPA<sup>18</sup>. We set out to study *let-7* regulation at the transcriptional level,

153 because of evidence for its importance in dedifferentiation<sup>17</sup> and potential influence on the  
154 metastatic disease course.

155

156 EMT is a fundamental process for development and homeostasis whereby epithelial cells lose  
157 their cell polarity and cell-cell adhesion, and gain the migratory and invasive features typical of  
158 mesenchymal cells<sup>23</sup>. The aberrant activation of EMT is considered to be a hallmark of cancer  
159 metastasis<sup>23–25</sup>. Many studies have found that EMT is not an all-or-none response; instead, it is  
160 a multi-step process, with cells existing in states ranging from fully epithelial to fully  
161 mesenchymal. Cells are observed in several intermediate or partial (hybrid) EMT states<sup>25</sup>. In  
162 fact, cancer cells that undergo partial EMT (cells without complete loss of epithelial morphology  
163 or complete acquisition of mesenchymal morphology) have been reported to pose a higher  
164 metastatic risk<sup>26,27</sup>. Besides metastasis, cancer cells that undergo EMT demonstrate enhanced  
165 stemness, including tumor initiation ability and capacity to differentiate to multiple lineages<sup>2,28,29</sup>.  
166 The subpopulation within cancer cells that have higher stemness has been shown to contribute  
167 to the tumor's invasiveness and resistance to therapies<sup>30,31</sup>. Hence, targeting stem-like cancer  
168 cells via EMT may be a crucial step to improve patient outcome.

169

170 Much evidence connects EMT with the acquisition of stem cell properties. Cells that have  
171 undergone EMT acquire the ability to differentiate to multiple lineages<sup>28</sup>. The expression of EMT  
172 transcription factors *SNAI1*, *TWIST1*, or *ZEB1* results in an increase in the proportion of cells  
173 with stem cell properties<sup>29,32,33</sup>. Recent work demonstrates that it is the cells with hybrid  
174 properties that are most active in assays for stemness, and *SNAI1* expression locks cells in the  
175 hybrid state<sup>34</sup>. *SNAI1*'s transcription factor roles include repression of epithelial factors such as  
176 *CDH1*, stimulation of mesenchymal factors, and repression of miRNAs such as miR-34<sup>23,35</sup>. We  
177 chose to focus on the EMT factor *SNAI1* because of its role in reprogramming somatic cells to  
178 pluripotency<sup>17,36</sup> and in cancer stemness<sup>29,33,37</sup>. Furthermore, *SNAI1* interacts with the miRNA of  
179 interest – *let-7*. It binds *let-7* family promoters and its early upregulation in reprogramming  
180 correlates with loss of *let-7*<sup>17</sup>. Because the increase of *SNAI1* and the decrease of *let-7* occurred  
181 at time points in reprogramming prior to upregulation of *LIN28A*, we hypothesized that it might  
182 be the loss of *let-7*, rather than the gain of *LIN28A*, that destabilized the differentiated state. In  
183 the studies presented here, we asked whether these reprogramming principles applied in  
184 cancer: does expression of *SNAI1* lead to loss of *let-7* and gain of stemness?

185

186 One promising approach to target genes such as EMT transcription factors is antisense  
187 oligonucleotide strategies, but avoiding degradation by ubiquitous nucleases, preventing  
188 immune activation, and allowing extravasation and cellular uptake to targeted cells present  
189 technical challenges for this technique<sup>38</sup>. Poor cytoplasmic delivery of RNA therapeutics to  
190 appropriate cells has inhibited research progress, but our team has optimized a targeted  
191 nanoparticle delivery method to deliver RNAs to tumors<sup>39</sup>. Mesoporous silica nanoparticles  
192 (MSN) are small (50-200nm), but have relatively large surface area due to their pore structure<sup>40</sup>.  
193 Coating them with cationic polyethylenimine (PEI) facilitates loading of siRNA cargo, and  
194 conjugation with hyaluronic acid (HA) assists in delivery to target cells<sup>41,42</sup>: HA is the ligand for  
195 CD44, enriched on the surface of ovarian cancer stem cells<sup>43</sup>.

196  
197 In this study, we hypothesized that *SNAI1* directly represses miRNA *let-7* transcription, and that  
198 *SNAI1* knockdown would result in restoration of *let-7* expression and reduction of stemness and  
199 tumor growth. Using breast, pancreatic, and ovarian cancer cells, transforming growth factor  
200 beta-1 (TGFB1) or epidermal growth factor (EGF) treatment or *SNAI1* overexpression increased  
201 stemness and reduced *let-7* expression, while *SNAI1* knockdown reduced stemness and  
202 increased *let-7* expression. We demonstrate on the molecular level that *SNAI1* binds promoters  
203 of *let-7* family members in cancer cells. Luciferase assays demonstrate that the presence of  
204 *SNAI1* reduces *let-7* transcription, consistent with direct repression of *let-7* by *SNAI1*. Thus, one  
205 mechanism by which EMT promotes stemness is via loss of *let-7*, destabilizing the differentiated  
206 state. With the utilization of the orthotopic patient-derived xenograft (PDX) murine models of  
207 high grade serous ovarian carcinoma (HGSOC), we demonstrate feasibility of *in vivo* *SNAI1*  
208 knockdown, delivering siRNA with mesoporous silica nanoparticles. In orthotopic PDX, *SNAI1*  
209 knockdown results in increased *let-7* levels and reduced tumor growth.

210

211

## 212 **Materials and Methods:**

### 213 Cell cultures

214

215 The human HGSOC cell line OVSAHO (RRID:CVCL\_3114) was the kind gift of Gottfried  
216 Konecny (University of California Los Angeles), and OVCAR8 (RRID:CVCL\_1629) was from  
217 Carlotta Glackin (City of Hope). HEK293T (RRID:CVCL\_0063), PANC-1 (RRID:CVCL\_0480)  
218 (gift of Nathan Wall, Loma Linda University (LLU)), MCF-7 (RRID:CVCL\_0031) (gift of Eileen  
219 Brantley, LLU), OVSAHO and OVCAR8 cells were cultured in Dulbecco's Modification of

220 Eagle's Medium (DMEM) with 10% fetal bovine serum (FBS), 2mM of L-Glutamine, 100 U/mL of  
221 penicillin, and 10 µg/mL of streptomycin. NCCIT (RRID:CVCL\_1451), used as a positive control  
222 for expression of pluripotency factors, was cultured in RPMI with 10% FBS, 2mM L-Glutamine,  
223 1mM sodium pyruvate, 100 U/mL of penicillin, and 10 µg/mL of streptomycin. MCF-7 and  
224 PANC-1 cells were treated with TGFB1 (10 ng/ml), OVCAR8 and OVSAHO cells were treated  
225 with EGF (100 ng/ml). PDX6, a HGSOc chemotherapy naïve sample, was obtained as  
226 described<sup>20</sup>. All studies were approved by the Loma Linda University (LLU) institutional review  
227 board (IRB). Deidentified fresh ovarian cancer ascites samples was provided by the LLU  
228 Biospecimen Laboratory and were processed by centrifuging. Erythrocytes were removed by  
229 overlaying a cell suspension on a 3ml Ficoll gradient. Cells were initially engrafted into NSG  
230 mice subcutaneously in the region of the mammary fat pad, resulting in PDX. Patient-derived  
231 samples were cultured in three parts Ham's F12 and one part DMEM, supplemented with 5%  
232 FBS, 10uM insulin, 0.4uM hydrocortisone, 2 ug/ml isoprenaline, 24 ug/ml adenine, 100 U/ml of  
233 penicillin, and 10 ug/mL streptomycin. 5-10 uM Y27632 was added to establish growth *in vitro*<sup>44</sup>.  
234 Low passage (maximal passage number: 15) patient-derived cells were used to avoid changes  
235 induced by extensive passaging in *in vitro* culture.

236 All human cell lines have been authenticated using STR profiling within the last three years.

237 All experiments were performed with mycoplasma-free cells.

238

239

#### 240 Reverse-transcription quantitative PCR (RT-qPCR)

241

242 Total RNA from cell culture samples was isolated using TRIzol reagent (Life Technologies,  
243 Carlsbad, CA, USA) according to the manufacturer's instructions. For mRNA expression  
244 analysis, cDNA was synthesized with 1 µg of total RNA using Maxima First Strand cDNA  
245 Synthesis Kit (K1672; Thermo fisher scientific, Grand Island, NY, USA). Real-time RT-qPCR for  
246 mRNA was performed using PowerUP SYBR Green master mix (Thermo fisher scientific, Grand  
247 Island, NY, USA) and specific primers on a Stratagene Mx3005P instrument (Agilent  
248 Technology, Santa Clara, CA, USA). Primer sequences are listed in Supplementary Table 2.  
249 For miRNA expression analysis, cDNA was synthesized with 100 ng of total RNA using specific  
250 stem-loop RT primers and TaqMan microRNA Reverse Transcription Kit (Applied Biosystems,  
251 Foster City, CA, USA). Real-time RT-qPCR for miRNA was performed using TaqMan Universal  
252 PCR Master Mix II (Applied Biosystems, Foster City, CA, USA) with specific probes (Life  
253 Technologies 4440887 assay numbers 000377 (let-a), 002406 (let-7e), 002282 (let-7g), 002221

254 (let-7i), U47 (001223)) on a Stratagene Mx3005P instrument (Agilent Technology, Santa Clara,  
255 CA, USA). The results were analysed using the  $\Delta\Delta$  cycles to threshold ( $\Delta\Delta$ Ct) method; ACTB  
256 (mRNA) and U47 (miRNA) were used for normalization.

257

#### 258 Western blot

259

260 Proteins were extracted from cells in PBS by adding SDS sample buffer (2% SDS, 2.5% beta-  
261 mercaptoethanol, 7.5% glycerol) and then sonicated for 10 - 15 sec. 30 ul of lysate per sample  
262 ( $2.4 \times 10^5$  cells) were heated to 100°C for 5 min and then loaded on SDS-PAGE gel [4-12%].

263 After running at 150 V for 20-40 min, samples were transferred to PVDF membrane.

264 Membranes were incubated in 5% milk for blocking for 1 hr at room temperature. After blocking

265 and washing with 1X TBST, membranes were incubated in primary antibodies diluted at the

266 appropriate dilution (as suggested by manufacturer data sheets) over night at 4°C. Antibodies

267 used include: HMGA2 (D1A7, Cell Signaling Technology, Danvers, MA), GAPDH (14C10, Cell

268 Signaling Technology, Danvers, MA), SNAI1 (L70G2; Cell Signaling Technology, Danvers, MA),

269  $\alpha/\beta$ -TUBULIN (2148S; Cell Signaling Technology, Danvers, MA, USA). Secondary antibody

270 incubations were done with an anti-mouse IgG conjugated with DyLight 800 (SA5-10176;

271 Invitrogen, Carlsbad, CA, USA) or anti-rabbit IgG antibody conjugated with DyLight 680 (35569;

272 Invitrogen, Carlsbad, CA, USA) at 1/30000 for 1 hr at room temperature. Immunoblots were

273 scanned and visualized using Odyssey Infrared Imaging System (LI-COR Biosciences, Lincoln,

274 NE, USA). Densitometry was performed on scanned immunoblots by ImageJ software (National

275 Institutes of Health, Bethesda, MD, USA). Quantification of Western blot data was done by

276 measuring the intensity of bands of the protein of interest divided by the intensity of the

277 samples' own  $\alpha/\beta$ -TUBULIN bands (ImageJ).

278

#### 279 Retroviral overexpression

280

281 The cDNA of human *SNAI1* was subcloned from Flag-Snail WT (Addgene 16218) into pWZL-

282 Blast-GFP (Addgene 12269) after removing GFP using BamH1/Xho1. Retroviral particles were

283 produced in HEK293T cells after co-transfection of retrovirus plasmid vector pWZL-Blast-Flag-

284 Snail or control vector pWZL-Blast-Flag-Empty with packaging plasmids (VSVG, Gag/pol) using

285 polyethylenimine (PEI) (Polyscience). After 48h and 72h, supernatant containing virus was

286 collected and filtered through a 0.22  $\mu$ M filter. Supernatants were used for cell transduction or



287 stored at -80 °C. Cells were transduced with retrovirus in the presence of 6 µg/ml protamine  
288 sulfate and selected with 5 µg/ml Blasticidin (InvivoGen #ant-bl-05) for 5 days.

289

### 290 DsiRNA-mediated knockdown

291

292 A panel of dicer-substrate small inhibitory RNAs (DsiRNA, IDT) were screened for SNAI1  
293 knockdown (Supplementary Figure 3). HA-conjugated, PEI-coated MSNs were synthesized as  
294 described<sup>41</sup>; in brief, MSNs were produced using the sol-gel method, dissolving 250mg  
295 cetyltrimethylammonium bromide in 120ml water with 875µl of 2M sodium hydroxide solution.  
296 Second, 1.2ml tetraethylorthosilicate was added, stirred for 2 hours, allowing formation of MSN.  
297 Particles were collected by centrifugation, and washed with methanol and acidic methanol. Low  
298 molecular weight cationic PEI (1.8 kDa branched polymer) was electrostatically attached to the  
299 MSN surface to provide a positive charge to attract negatively charged siRNA<sup>41</sup>, and HA was  
300 covalently bound to the amine groups in the PEI using EDC-NHS coupling reaction<sup>45</sup>. DsiRNA  
301 targeting SNAI1 or control (oligonucleotides sequence listed in Supplementary Table 4) were  
302 used for knockdown *in vitro*, loaded on MSN as described<sup>39</sup>. To complex siRNA for *in vitro*  
303 experiments, 10 µl siRNA at 10 µM was mixed with 70 µl MSNs at 500 µg/ml and 20 µl water,  
304 and the mixture was incubated overnight at 4 °C on a rotor. The following day, 100 µl of the HA-  
305 MSN-siRNA complexes was added to each well of a 6-well plate containing 1900 µl normal  
306 medium. To complex siRNA for *in vivo* experiments, 15 µl siRNA at 10 µM was mixed with 105  
307 µl HA-MSNs at 500 µg/ml, and the mixture was incubated overnight at 4 °C on a rotor. The  
308 following day, 120 µl of the HA-MSN-siRNA complexes were injected intravenously (tail vein).  
309 For *in vivo* experiments, HA-MSN-siRNA were injected twice weekly.

310

311

### 312 Mimic transfection

313

314 Let-7i mimics (sense: 5' - mCmArGmCrAmCrAmArAmCrUmArCmUrAmCrCmUrCA - 3';  
315 antisense 5' - /5Phos/rUrGrArGrGrUrArGrUrArGrUrUrUrGrUrGrCrUmGmUrU - 3') and  
316 scrambled control mimics (sense 5' - mCmArUmArUmUrGmCrGmCrGmUrAmUrAmGrUmCrGC  
317 - 3'; antisense5' - /5Phos/rGrCrGrArCrUrArUrArCrGrCrGrCrArArUrArUmGmG rU - 3'; IDT) were  
318 reverse transfected at 2nM using Lipofectamine RNAiMax (Life Technologies) according to  
319 manufacturer guidelines.

320

321 Chromatin Immunoprecipitation (ChIP)

322

323 ChIP assay was conducted using MAGnify™ Chromatin Immunoprecipitation System (Thermo  
324 Fisher Scientific, #49-2024) according to manufacturer directions. Untreated OVCAR8,  
325 OVSAHO, MCF-7 cells with or without 10 ng/mL of TGFB1 were crosslinked with 1%  
326 formaldehyde. 1.25 M glycine in cold PBS were then added to stop the crosslinking reaction.  
327 Cell lysates were prepared with lysis buffer with protease inhibitors (50µL per 1 million cells).  
328 Chromatin was then sheared into 200-500-bp fragments using *Fisher Scientific Sonic*  
329 *Dismembrator Model F60 With Probe*. Each immunoprecipitation (IP) reaction contains 100,000  
330 cells. Dynabeads® were coupled with anti-Snail (L70G2; Cell Signaling Technology, Danvers,  
331 MA) or Mouse IgG (supplied in MAGnify kit) as negative controls (1 µg per CHIP). After 1 hour  
332 on a rotor, these antibody-Dynabeads® complexes were incubated with chromatin and put on  
333 rotor for 2 hours at 4°C. As input control, 10 µL of diluted chromatin were put aside without  
334 binding to the antibody-Dynabeads® complexes. After chromatin-Antibody-Dynabeads®  
335 complexes were washed with IP Buffer to remove unbound chromatin. Reverse Crosslinking  
336 Buffer was added to reverse the formaldehyde crosslinking. Real-time RT-qPCR for DNA was  
337 performed using PowerUP SYBR Green master mix (Thermo fisher scientific, Grand Island, NY,  
338 USA) and specific primers on a Stratagene Mx3005P instrument (Agilent Technology, Santa  
339 Clara, CA, USA). Primer sequences are listed in Supplementary Table 3. The results were  
340 analyzed using the  $\Delta\Delta$  cycles to threshold ( $\Delta\Delta Ct$ ) method; ACTB was used for normalization.

341

342 Luciferase assays

343

344 HEK293T cells were plated at 50,000 cells per well. Twenty-four hours later PEI reagent was  
345 used to transfect cells with 200ng full length *let-7*, truncated *let-7i (lucB)*, or mutated *let-7i*  
346 (*mlucB*) promoter luciferase vector in combination with 5ng Renilla luciferase, and 200ng  
347 *SNAI1*-expressing or empty vector (Addgene 16218). Forty-eight hours post transfection (or  
348 twenty-four hours for promoter truncation/mutation) dual-luciferase reporter assay kit (Promega)  
349 was used to analyze bioluminescence on SpectraMax i3x microplate reader (Molecular Devices,  
350 Sunnyvale, CA, USA). *Let-7a1df1* promoter luciferase was a kind gift from Dr. Zifeng Wang<sup>46</sup>,  
351 *let-7a3* from Dr. Hillary Collier<sup>47</sup>, *Let-7c* from Dr. Maria Rizzo<sup>48,49</sup>, full length *let-7i* from Dr. Steve  
352 O'Hara<sup>50</sup>, and truncated (*lucB*)/mutated (*mlucB*) *let-7i* from Dr. Muh-Hwa Yang<sup>51</sup>.

353

354 Spheroid formation assay

355

356 Cells were plated at a density of 10,000 cells/mL (12,000 cells/ml for PDX6 cells) in non-tissue  
357 culture coated plates, 10 technical replicates per condition, and maintained in serum-free  
358 medium (DMEM/F12 50/50) supplemented with 0.4% bovine serum albumin, 10ng/mL FGF,  
359 20ng/mL EGF, 6.7ng/ml selenium, 5.5ug/ml transferrin, 10ug/ml insulin, and 1% knock out  
360 serum replacement (Gibco/ThermoFisher Scientific) for 7 days. Secondary spheroid assays  
361 were done by harvesting after seven days, trypsinization, and re-seeding at 10,000 cells/mL,  
362 followed by seven additional days of growth. To determine the number and size of spheroids,  
363 phase contrast images of spheroids taken on a Nikon Eclipse Ti microscope were analyzed  
364 using ImageJ software (National Institutes of Health, Bethesda, MD, USA).

365

### 366 Mice

367

368 All animal procedures were conducted according to animal care guidelines approved by the  
369 Institutional Animal Care and Use Committee at Loma Linda University. Orthotopic PDX  
370 experiments were carried out in nude mice (nu/nu), obtained from Jackson Laboratory  
371 (Sacramento, CA, USA), which were housed in specific pathogen-free conditions, and were  
372 used for xenografts at 6-10 weeks of age.

373

### 374 Orthotopic xenograft model and live animal imaging.

375

376 To allow *in vivo* visualization, PDX6 cells were transduced with a CMV-p:EGFP-ffluc pHIV7  
377 lentiviral vector (eGFP-ffluc, kind gift of Christine Brown)<sup>52</sup>, which encodes a fusion protein of  
378 GFP and firefly luciferase. The eGFP-ffluc-transduced PDX6 cells were selectively isolated  
379 based on GFP expression via FACS Aria cell sorter (BD Biosciences, San Jose, CA, USA).  
380 PDX6 cells were injected into the right ovarian bursa of nude mice with Matrigel (354248;  
381 Corning, Corning, NY, USA) at  $2.5 \times 10^5$  cells per mouse, eight mice per condition. For *in vivo*  
382 experiments, DsiRNA with 2'-O-methyl modifications were used<sup>53</sup> (oligonucleotides sequence  
383 listed in Supplementary Table 4). Starting 1 week after initial injection and continuing twice  
384 weekly, HA-MSN-siRNA were injected intravenously. After intraperitoneal injection of luciferin,  
385 the mice were imaged with an IVIS Lumina Series III *in vivo* imaging system (PerkinElmer,  
386 Waltham, MA, USA). Live imaging was performed twice weekly and the bioluminescent images  
387 were analyzed using Living Image *in vivo* Imaging Software (PerkinElmer, Waltham, MA, USA)  
388 to assess tumor burden at primary and metastatic sites. At day 1, 16 mice were randomized and

389 assigned into two groups (siControl and siSnail, 8 mice each). The bioluminescence of animals  
390 from each group was measured at each time point. Based on tumor development, some mice  
391 were censored from analyses. Each animal's measurement was normalized to its own  
392 bioluminescence from day one and then the means for each time point were analyzed using a  
393 two-way ANOVA. To determine endpoints, mouse abdominal girth was measured prior to  
394 surgery and monitored once a week. When the first mouse reached the endpoint of an increase  
395 of 25% in girth, all mice were euthanized, and necropsy was carried out. Primary and metastatic  
396 tumor weight and tumor locations were recorded, and samples were harvested for gene and  
397 protein expression analysis.

398

### 399 Statistical analyses

400

401 For all *in vitro* experiments, cell samples in the same treatment group were harvested from at  
402 least 3 biological replicates and processed individually. For *in vivo* experiments, data are from  
403 one representative experiment of three. All values in the figures and text are the means  $\pm$  SD.  
404 Statistical analyses were performed using the Prism 7.0a for Mac OS X (GraphPad Software,  
405 Inc.). Statistical significance among mean values was determined by Student's t-test with two-  
406 tailed alpha level of 0.05 considered significant, with the exception of tumor growth in the *in vivo*  
407 study, which is determined by two-way ANOVA with Tukey's multiple comparison test. \*,  $P <$   
408 0.05; \*\*,  $P < 0.01$ ; \*\*\*,  $P < 0.001$ ; \*\*\*\*,  $P < 0.0001$ .

409

410

## 411 **Results:**

### 412 *SNAI1* leads to increased stemness

413

414 To test the relationship between *SNAI1* expression and changes in stemness, we induced  
415 *SNAI1* expression with growth factors including TGFB1 and EGF<sup>54,55</sup>. We tested several cancer  
416 cell lines of epithelial origin including pancreatic (PANC-1), breast (MCF-7), and ovarian  
417 (OVCAR8 and OVSAHO).

418

419 After two days of TGFB1 (MCF-7 or PANC-1) or EGF (OVSAHO or OVCAR8) treatment, as  
420 expected, RNA and protein expression levels of *SNAI1* increased, confirmed by RT-qPCR  
421 (Figure 1A) and Western blot (Figure 1C, Supplementary Figure 2A). TGFB1 does not induce  
422 *SNAI1* expression in OVSAHO or OVCAR8 (Supplementary Figure 1B); for this reason, ovarian

423 cancer cell lines were treated with EGF. The smaller change in *SNAI1* protein observed in  
424 OVCAR8 could be explained by its high endogenous *SNAI1* level as previously described<sup>56</sup>;  
425 endogenous levels of all cell lines are shown in Supplementary Figure 1A. mRNA expression of  
426 stemness markers *LIN28A*, *NANOG*, *POU5F1* and *HMGA2* increased after treatment (Figure  
427 1B). Western blot analysis showed an increase of *HMGA2* protein in OVSAHO (43%) (Figure  
428 1D, Supplementary Figure 2B); however, this was not detectable in other lines. We used  
429 spheroid assays as a measure of self-renewal and growth in non-adherent conditions, which are  
430 increased with higher stemness<sup>56,57</sup>. In agreement with the phenotypic measurements above,  
431 cells in which *SNAI1* expression was induced via TGFB1 or EGF formed more spheroids,  
432 indicating a higher frequency of cells with stem cell attributes (Figure 1E). This trend is more  
433 significant after one passage, where the increase in number of spheroids formed upon TGFB1  
434 or EGF treatment is even larger (Supplementary Figure 5B). Along with the increased *SNAI1*  
435 expression, consistent with a change to a more stem cell-like gene expression pattern, we  
436 observed a decrease in expression levels of *let-7* family members (Figure 1F). We chose to  
437 follow one *let-7* member from each of four clusters on chromosomes 3, 9, 12, and 19<sup>21</sup>.

438  
439 Because growth factor-induced EMT resulted in changes consistent with an increase in  
440 stemness, we wished to pinpoint mechanisms of stemness downstream of EMT. Our previous  
441 studies indicated a role for *SNAI1* in the induction of the stem cell fate<sup>17</sup>. Besides inducing EMT,  
442 the TGFB1 signaling pathway is important in mediating cellular proliferation, preventing  
443 progression through the cell cycle, and multiple other actions<sup>54</sup>. EGF also plays an important  
444 role in the development of tumors by regulating cell proliferation, differentiation, migration and  
445 angiogenesis<sup>55</sup>. Thus, treatment with these growth factors changes the expression of numerous  
446 genes besides *SNAI1*. To specify the effect of a single factor, *SNAI1*, we overexpressed *SNAI1*  
447 to determine whether it alone could induce the stem cell state. Cell lines were virally transduced  
448 with constitutively expressed *SNAI1* or control vector.

449  
450 After transduction, the increase in *SNAI1* mRNA and protein expression (Figure 2A, 2C and  
451 Supplementary Figure 4A) was accompanied by a significant increase in stemness markers  
452 *LIN28A*, *POU5F1*, and *HMGA2* (Figure 2B). Western blot data confirmed this change, showing  
453 an increase in *HMGA2* (Figure 2D, Supplementary Figure 4B). With the increase in expression  
454 of *SNAI1* and stemness genes, we observed a decrease in *let-7* family members (Figure 2F).  
455 Consistent with the phenotypic changes, *SNAI1* overexpression led to an increase in the  
456 number of spheroids formed (Figure 2E, Supplementary Figure 4C) (the size of spheroids for

457 OVCAR8 is quantified and presented in Supplementary Figure 5A), to a greater extent in  
458 secondary spheroids (Supplementary Figure 5B), suggesting increased stemness associated  
459 with *SNAI1*. In order to investigate whether the regulation of stemness is directly through  
460 *SNAI1*'s action on *let-7*, we overexpressed *let-7i* in *SNAI1* overexpressing cells (Supplementary  
461 Figure 6A). *Let-7i* overexpression resulted in abrogation of *SNAI1*-induced stemness as  
462 measured by RT-qPCR (Supplementary Figure 6B) and spheroid formation (Supplementary  
463 Figure 6C, D). These results confirmed that *SNAI1* overexpression is sufficient to shift the  
464 phenotype toward stemness via its effect on *let-7*.

465

#### 466 *SNAI1* knockdown reverses stemness

467

468 Having established the impact of *SNAI1*'s gain-of-function on cells' stemness and *let-7* levels,  
469 we proceeded to knock down *SNAI1* to test if the opposite effects could be observed. We used  
470 HA-conjugated MSN<sup>41</sup> (HA-MSN) to deliver siRNA in MCF-7, PANC-1, OVSAHO and OVCAR8.  
471 We observed a decrease in the mRNA expression level of *SNAI1* after HA-MSN-siSnail  
472 treatment in most cases (Figure 3A). The knockdown of *SNAI1* was confirmed on the protein  
473 level with Western blot data (Figure 3C, Supplementary Figure 7A). Together with the decrease  
474 of *SNAI1*, the expression of stemness markers also decreased on the mRNA level (Figure 3B).  
475 HMGA2 protein also decreased in PANC-1 and OVSAHO after siSnail treatment (Figure 3D,  
476 Supplementary Figure 7B). *SNAI1* knockdown resulted in reduced frequency of stem cells, as  
477 measured by number of spheroids formed (Figure 3E, Supplementary Figure 7C), and  
478 secondary spheroids showed a greater difference between siSnail and siControl  
479 (Supplementary Figure 5B). An increase in spheroid size in OVCAR8 was also observed  
480 (Supplementary Figure 5A). Consistent with the *SNAI1* time course, *let-7* expression increased  
481 after *SNAI1* knockdown (Figure 3F). Similar effects were observed with two siRNAs  
482 (Supplementary Figure 8). These results indicate that reducing *SNAI1* expression leads to  
483 decreased stemness as well as restoration of *let-7* expression in cancer cells.

484

485

#### 486 *SNAI1* knockdown reverses stemness in patient derived HGSOc samples *in vitro* and 487 decreases tumor burden *in vivo*

488

489 To test our findings in a more clinically relevant setting, we knocked down *SNAI1* in patient-  
490 derived cells *in vitro* using HA-MSN-siSnail (Figure 4A, C and Supplementary Figure 9A). In

491 agreement with our observations in cell lines, PDX cells treated with HA-MSN-siSnail showed  
492 decreased levels of stemness markers (Figure 4B,D and Supplementary Figure 9A), decreased  
493 size (Supplementary Figure 5A) and number of spheroids formed (Figure 4E, Supplementary  
494 Figure 9B), and increased levels of *let-7* (Figure 4F).

495  
496 To extend these results to an *in vivo* setting, luciferized PDX6 cells were injected into the  
497 ovarian bursa of nude mice in our orthotopic xenograft model<sup>56</sup>. Mice were imaged twice weekly  
498 for bioluminescence, and total flux was quantified over seven weeks. One week after bursa  
499 injection, treatment with HA-MSN-siSnail (or HA-MSN-siControl) began and continued twice  
500 weekly for the duration of the experiment. Upon necropsy, RT-qPCR results showed a decrease  
501 of *SNAI1* along with reduced *LIN28A*, *NANOG* and *POU5F1* in tumors from mice treated with  
502 HA-MSN-siSnail (Figure 5A, B). In agreement with mRNA results, the protein levels of SNAI1,  
503 LIN28A and HMGA2 were significantly decreased in mice treated with HA-MSN-siSnail (Figure  
504 5C, D and Supplementary Figure 10A). Consistent with the *in vitro* results, *let-7* levels were also  
505 increased in mice treated with HA-MSN-siSnail (Figure 5E). In addition, primary tumor weights  
506 demonstrated smaller tumors in siSnail mice (Supplementary Figure 10B). Visualization of  
507 tumors in live animals revealed that primary tumors were significantly smaller in mice receiving  
508 HA-MSN-siSnail injections (Figure 5F). These results demonstrate that *SNAI1* was successfully  
509 knocked down *in vivo* using targeted nanoparticle-delivered RNAi. Taken together, our results  
510 demonstrate that knockdown of *SNAI1* in patient derived HGSOc samples *in vitro* and *in vivo*  
511 results in restoration of *let-7*, decreased stemness, and reduced tumor burden.

#### 512 513 *SNAI1* binds *let-7* promoters resulting in *let-7* repression

514  
515 We sought to establish whether *SNAI1* acts to directly repress *let-7* transcription. *SNAI1* binds  
516 promoters of *let-7* in fibroblasts, and binding increases upon *SNAI1* overexpression<sup>17</sup>. To  
517 examine whether this same association can be observed in cancer cells, we carried out CHIP  
518 assays to determine binding of *SNAI1* to the promoter region of various *let-7* family members,  
519 as defined by previous studies<sup>46-51</sup>. The *let-7i* promoter is diagrammed in Figure 6A;<sup>50,51</sup> the  
520 promoter region locations and the E-box (CANNTG) locations studied are listed in  
521 Supplementary Table 1. At baseline, we observed that *SNAI1* bound *CDH1* (used as a positive  
522 control) and *let-7* promoters to a greater extent in OVCAR8, the cell line with higher *SNAI1*  
523 expression, than in OVSAHO<sup>56</sup> (Supplementary Figure 11A). We also assessed binding upon  
524 EMT induction by TGFβ1 in MCF-7 cells and detected an increased level of *let-7i* and *miR-98*

525 promoter binding compared to the control group (Supplementary Figure 11B). These data  
526 demonstrate *SNAI1* binding to *let-7* promoter regions in cancer cells tested.

527  
528 To test the functional result of *SNAI1* binding to *let-7* promoters, luciferase assays were used as  
529 a reporter for *let-7* promoter activity via bioluminescence. We used *let-7* promoter luciferase  
530 constructs as shown in Figure 6A (bottom diagram; see Supplementary Table 1). This enabled  
531 us to detect the effect of *SNAI1* on *let-7i*, *let7a1/d/f1*, *let-7a-3*, and *let-7c* promoter activity. Co-  
532 transfection with *let-7* promoter luciferase and *SNAI1* (constitutively expressed), as compared  
533 with empty vector, resulted in a reduction in bioluminescence (Figure 6B), confirming the  
534 repression of *let-7* promoter activity. A *let-7i* promoter luciferase mutated to remove E-box one  
535 was not inhibited by Snail (Figure 6C). These results demonstrate that *SNAI1* binding to *let-7*  
536 promoters directly represses *let-7* transcription.

537

538

## 539 Discussion

540 *Let-7*'s major roles in maintenance of differentiation make it a key player in both development  
541 and cancer<sup>13,14</sup>. Loss of *let-7* is a major component of the loss of differentiation seen in many  
542 cancers, and significantly correlates with poor prognosis<sup>13,16,18,19</sup>. Studies of stem cell  
543 reprogramming linked *let-7* repression with a transcription factor that induces EMT, *SNAI1*<sup>17</sup>. In  
544 the present study, we examined the role of *let-7* in cancer cells and its connection to *SNAI1*.  
545 When cells from breast (MCF-7), pancreatic (PANC-1) and ovarian (OVCAR8, OVSAHO)  
546 cancer were treated with EMT-inducing agents (TGFB1 or EGF), increases in EMT factors  
547 including *SNAI1*, increases in stemness markers, and decreases in *let-7* could be detected. This  
548 positive association between *SNAI1* and stemness, as well as the negative association between  
549 *SNAI1* and *let-7*, were confirmed when *SNAI1* itself was overexpressed through viral  
550 transduction or knocked down by siRNA.

551

552 One of the goals of this investigation was to understand the molecular mechanisms by which  
553 *SNAI1* exerts its pro-stemness effects. The effect of *SNAI1* on *let-7* levels, and its direct binding  
554 to several *let-7* family member promoter regions, were detected using ChIP and luciferase  
555 assays, providing evidence that *SNAI1* binds *let-7* promoters and directly represses its  
556 expression, leading to an increase in stemness in cancer cells. Although EMT has been linked  
557 to stemness, few insights into downstream mechanisms have been generated. One  
558 downstream effector of *SNAI1* and other EMT programs is the transcription factor FOXC2 via



559 the serine/threonine kinase p38, thus linking EMT and stem cell traits<sup>35</sup>. Another avenue by  
560 which *SNAI1* exerts stemness is via repression of miR-34 via effects on WNT signaling,  
561 NOTCH, and CD44<sup>58</sup>. Our results provide evidence for the *SNAI1/let-7* axis as another crucial  
562 mechanism by which EMT exerts pro-stemness roles. These results point to *SNAI1* as a stem  
563 cell-directed target for therapy.

564

565 *SNAI1* may be a particularly apt target in the goal of eliminating CSC because of its role in the  
566 stabilization of the hybrid epithelial-mesenchymal state<sup>34,59</sup>. OVCAR8 parental cells showed the  
567 highest level of stemness markers (*LIN28A*, *NANOG*, *POU5F1* and *HMGA2*, along with a high  
568 level of epithelial marker *CDH1* and mesenchymal markers *SNAI1* and *VIM* (Supplementary  
569 Figure 1A), suggesting its hybrid EMT status. *SNAI1* is highly expressed in all of the cell types  
570 examined here (Supplementary Figure 1A), and further studies will determine whether *SNAI1*-  
571 dependent *let-7* repression plays a role in the hybrid state.

572

573 *SNAI1* inhibition via transfection, viral delivery, or genetic deletion has been shown to reduce  
574 invasion, proliferation, chemoresistance, and other components of the stemness  
575 phenotype<sup>56,60,61</sup>. However, because these approaches cannot be considered for use in patients,  
576 other approaches such as nanoparticle-mediated delivery must be developed. Small RNAs can  
577 be efficiently loaded onto MSNs, which protect the oligonucleotides from degradation, are  
578 enriched in tumors due to leaky vasculature, and are taken up into cells by pinocytosis and as  
579 such function as a transfection reagent<sup>42</sup>. Their large surface area and pore structure make  
580 them ideal for drug delivery<sup>40</sup>. MSNs are a promising delivery agent for RNAi *in vivo*<sup>41,45,62</sup>.  
581 Considering this potential, and with the goal of clinical relevance, we used MSN to knock down  
582 *SNAI1*. *SNAI1* downregulation could be detected on both RNA and protein levels, emphasizing  
583 the utility of MSN for siRNA delivery. We extended these results to *in vivo* experiments where  
584 we knocked down *SNAI1* in our orthotopic PDX model<sup>56</sup>. We achieved >75% knockdown of  
585 *SNAI1* protein in tumors *in vivo*, and importantly tumor *let-7* levels increased 2-3 fold, consistent  
586 with *SNAI1*-mediated repression of *let-7* *in vivo*. In parallel, expression of stem cell markers  
587 *LIN28A*, *NANOG*, *POU5F1*, and *HMGA2* decreased, consistent with a shift away from the stem  
588 cell phenotype, demonstrating that targeting *SNAI1* is sufficient to reduce stemness. Further  
589 studies will determine if these changes lead to reduced metastasis or delayed recurrence.

590

591 Although these studies provide important insights into the mechanism for loss of *let-7* and thus  
592 the destabilization of the differentiated state, we do not address the question of the origin of

593 CSC. Rather, we suggest that any cell of origin, in order to take on cancer stem cell  
594 characteristics, will lose *let-7*. Like differentiated cells, adult stem cells express high levels of *let-*  
595 *7*<sup>63,64</sup>, therefore *let-7* loss via transcriptional, post-transcriptional, or epigenetic regulation is  
596 required even in the case that adult stem cells are the cell of origin. In the absence of *LIN28A*,  
597 transcriptional repression of *let-7* could tip the balance in favor of stemness. The mechanism by  
598 which *let-7* is lost is thus germane to cancer stem cell biology regardless of whether normal  
599 stem cells or differentiated cells are the cells of origin. Our finding that *SNAI1* transcriptionally  
600 represses *let-7* adds even more weight to *SNAI1* as a therapeutic target: blocking *SNAI1*, in  
601 addition to inhibiting invasion and migratory ability, is expected to restore *let-7* by increasing its  
602 transcription. We predict that *SNAI1*-mediated *let-7* repression could be an important  
603 mechanism of cancer stemness in a wide variety of carcinoma cells.

604  
605  
606  
607  
608  
609  
610  
611  
612  
613  
614  
615  
616  
617  
618  
619  
620  
621  
622  
623  
624  
625  
626  
627

628 **Acknowledgments:**

629 We thank Gottfried Konecny, Carlotta Glackin, Nathan Wall, and Eileen Brantley for cell lines,  
630 Jacqueline Coats for input on statistical analyses, members of the Perry lab for assistance with  
631 dynamic light scattering measurements of MSN, and members of the Unternaehrer lab for  
632 helpful discussions.

633  
634  
635  
636  
637

638 **Further Disclosures:**

639

640 **Financial Support:** This work was supported by a Grant to Promote Collaboration and  
641 Translation from Loma Linda University (LLU) to J.U. and Y.I., by a California Institute for  
642 Regenerative Medicine Inception Grant to JU (DISC1-10588), and by LLU start-up funding.

643

644

645 **Conflict of interest:** The authors declare no conflicts of interest.

646

647 **Data Availability Statement:** Data will be made available from the corresponding author upon  
648 reasonable request

649

650

651

652

653

654

655

656

657

658

659

660

661

662

663

664

665

666

667 **References:**

- 668 1. Kreso A, Dick JE. Evolution of the cancer stem cell model. *Cell Stem Cell* 2014;14:275–91.
- 669 2. Al-Hajj M, Wicha MS, Benito-Hernandez A, Morrison SJ, Clarke MF. Prospective  
670 identification of tumorigenic breast cancer cells. *Proc Natl Acad Sci U S A* 2003;100:3983–  
671 8.
- 672 3. Reya T, Morrison SJ, Clarke MF, Weissman IL. Stem cells, cancer, and cancer stem cells.  
673 *Nature* 2001;414:105–11.
- 674 4. Yamada Y, Haga H, Yamada Y. Concise review: dedifferentiation meets cancer  
675 development: proof of concept for epigenetic cancer. *Stem Cells Transl Med* 2014;3:1182–  
676 7.
- 677 5. Schwitalla S, Fingerle AA, Cammareri P, Nebelsiek T, Göktuna SI, Ziegler PK, Canli O,  
678 Heijmans J, Huels DJ, Moreaux G, Rupec RA, Gerhard M, et al. Intestinal tumorigenesis  
679 initiated by dedifferentiation and acquisition of stem-cell-like properties. *Cell* 2013;152:25–  
680 38.
- 681 6. Vermeulen L, De Sousa E Melo F, van der Heijden M, Cameron K, de Jong JH, Borovski T,  
682 Tuynman JB, Todaro M, Merz C, Rodermond H, Sprick MR, Kemper K, et al. Wnt activity  
683 defines colon cancer stem cells and is regulated by the microenvironment. *Nat Cell Biol*  
684 2010;12:468–76.
- 685 7. Friedmann-Morvinski D, Verma IM. Dedifferentiation and reprogramming: origins of cancer  
686 stem cells. *EMBO Rep* 2014;15:244–53.
- 687 8. Daley GQ. Common themes of dedifferentiation in somatic cell reprogramming and cancer.  
688 *Cold Spring Harb Symp Quant Biol* 2008;73:171–4.
- 689 9. Riggs JW, Barrilleaux BL, Varlakhanova N, Bush KM, Chan V, Knoepfler PS. Induced  
690 pluripotency and oncogenic transformation are related processes. *Stem Cells Dev*  
691 2013;22:37–50.
- 692 10. Kim J, Orkin SH. Embryonic stem cell-specific signatures in cancer: insights into genomic  
693 regulatory networks and implications for medicine. *Genome Med* 2011;3:75.
- 694 11. Gupta PB, Chaffer CL, Weinberg RA. Cancer stem cells: mirage or reality? *Nat Med*  
695 2009;15:1010–2.
- 696 12. Ben-Porath I, Thomson MW, Carey VJ, Ge R, Bell GW, Regev A, Weinberg RA. An  
697 embryonic stem cell-like gene expression signature in poorly differentiated aggressive  
698 human tumors. *Nat Genet* 2008;40:499–507.
- 699 13. Boyerinas B, Park S-M, Hau A, Murmann AE, Peter ME. The role of let-7 in cell  
700 differentiation and cancer. *Endocr Relat Cancer* 2010;17:F19-36.
- 701 14. Büsling I, Slack FJ, Grosshans H. let-7 microRNAs in development, stem cells and cancer.  
702 *Trends Mol Med* 2008;14:400–9.

- 703 15. Boyerinas B, Park S-M, Shomron N, Hedegaard MM, Vinther J, Andersen JS, Feig C, Xu J,  
704 Burge CB, Peter ME. Identification of let-7-regulated oncofetal genes. *Cancer Res*  
705 2008;68:2587–91.
- 706 16. Park S-M, Shell S, Radjabi AR, Schickel R, Feig C, Boyerinas B, Dinulescu DM, Lengyel E,  
707 Peter ME. Let-7 prevents early cancer progression by suppressing expression of the  
708 embryonic gene HMGA2. *Cell Cycle Georget Tex* 2007;6:2585–90.
- 709 17. Unternaehrer JJ, Zhao R, Kim K, Cesana M, Powers JT, Ratanasirintrawoot S, Onder T,  
710 Shibue T, Weinberg RA, Daley GQ. The epithelial-mesenchymal transition factor SNAIL  
711 paradoxically enhances reprogramming. *Stem Cell Rep* 2014;3:691–8.
- 712 18. Chirshev E, Oberg KC, Ioffe YJ, Unternaehrer JJ. Let-7 as biomarker, prognostic indicator,  
713 and therapy for precision medicine in cancer. *Clin Transl Med* 2019;8:24.
- 714 19. Shell S, Park S-M, Radjabi AR, Schickel R, Kistner EO, Jewell DA, Feig C, Lengyel E, Peter  
715 ME. Let-7 expression defines two differentiation stages of cancer. *Proc Natl Acad Sci U S*  
716 *A* 2007;104:11400–5.
- 717 20. Chirshev E, Hojo N, Bertucci A, Sanderman L, Nguyen A, Wang H, Suzuki T, Brito E,  
718 Martinez SR, Castañón C, Mirshahidi S, Vazquez ME, et al. Epithelial/mesenchymal  
719 heterogeneity of high-grade serous ovarian carcinoma samples correlates with miRNA let-  
720 7 levels and predicts tumor growth and metastasis. *Mol Oncol* 2020;
- 721 21. Lee H, Han S, Kwon CS, Lee D. Biogenesis and regulation of the let-7 miRNAs and their  
722 functional implications. *Protein Cell* 2016;7:100–13.
- 723 22. Viswanathan SR, Daley GQ, Gregory RI. Selective blockade of microRNA processing by  
724 Lin28. *Science* 2008;320:97–100.
- 725 23. Baum B, Settleman J, Quinlan MP. Transitions between epithelial and mesenchymal states  
726 in development and disease. *Semin Cell Dev Biol* 2008;19:294–308.
- 727 24. Micalizzi DS, Farabaugh SM, Ford HL. Epithelial-mesenchymal transition in cancer:  
728 parallels between normal development and tumor progression. *J Mammary Gland Biol*  
729 *Neoplasia* 2010;15:117–34.
- 730 25. Nieto MA. Epithelial plasticity: a common theme in embryonic and cancer cells. *Science*  
731 2013;342:1234850.
- 732 26. Pastushenko I, Blanpain C. EMT Transition States during Tumor Progression and  
733 Metastasis. *Trends Cell Biol* 2019;29:212–26.
- 734 27. Bocci F, Jolly MK, Tripathi SC, Aguilar M, Hanash SM, Levine H, Onuchic JN. Numb  
735 prevents a complete epithelial-mesenchymal transition by modulating Notch signalling. *J R*  
736 *Soc Interface* 2017;14.
- 737 28. Battula VL, Evans KW, Hollier BG, Shi Y, Marini FC, Ayyanan A, Wang R-Y, Brisken C,  
738 Guerra R, Andreeff M, Mani SA. Epithelial-mesenchymal transition-derived cells exhibit  
739 multilineage differentiation potential similar to mesenchymal stem cells. *Stem Cells Dayt*  
740 *Ohio* 2010;28:1435–45.

- 741 29. Mani SA, Guo W, Liao M-J, Eaton EN, Ayyanan A, Zhou AY, Brooks M, Reinhard F, Zhang  
742 CC, Shipitsin M, Campbell LL, Polyak K, et al. The epithelial-mesenchymal transition  
743 generates cells with properties of stem cells. *Cell* 2008;133:704–15.
- 744 30. Diehn M, Cho RW, Lobo NA, Kalisky T, Dorie MJ, Kulp AN, Qian D, Lam JS, Ailles LE,  
745 Wong M, Joshua B, Kaplan MJ, et al. Association of reactive oxygen species levels and  
746 radioresistance in cancer stem cells. *Nature* 2009;458:780–3.
- 747 31. Li X, Lewis MT, Huang J, Gutierrez C, Osborne CK, Wu M-F, Hilsenbeck SG, Pavlick A,  
748 Zhang X, Chamness GC, Wong H, Rosen J, et al. Intrinsic resistance of tumorigenic breast  
749 cancer cells to chemotherapy. *J Natl Cancer Inst* 2008;100:672–9.
- 750 32. Wellner U, Schubert J, Burk UC, Schmalhofer O, Zhu F, Sonntag A, Waldvogel B, Vannier  
751 C, Darling D, zur Hausen A, Brunton VG, Morton J, et al. The EMT-activator ZEB1  
752 promotes tumorigenicity by repressing stemness-inhibiting microRNAs. *Nat Cell Biol*  
753 2009;11:1487–95.
- 754 33. Morel A-P, Lièvre M, Thomas C, Hinkal G, Ansieau S, Puisieux A. Generation of breast  
755 cancer stem cells through epithelial-mesenchymal transition. *PLoS One* 2008;3:e2888.
- 756 34. Kröger C, Afeyan A, Mraz J, Eaton EN, Reinhardt F, Khodor YL, Thiru P, Bieri B, Ye X,  
757 Burge CB, Weinberg RA. Acquisition of a hybrid E/M state is essential for tumorigenicity of  
758 basal breast cancer cells. *Proc Natl Acad Sci U S A* 2019;116:7353–62.
- 759 35. Siemens H, Jackstadt R, Hüntgen S, Kaller M, Menssen A, Götz U, Hermeking H. miR-34  
760 and SNAIL form a double-negative feedback loop to regulate epithelial-mesenchymal  
761 transitions. *Cell Cycle Georget Tex* 2011;10:4256–71.
- 762 36. Gingold JA, Fidalgo M, Guallar D, Lau Z, Sun Z, Zhou H, Faiola F, Huang X, Lee D-F,  
763 Waghray A, Schaniel C, Felsenfeld DP, et al. A genome-wide RNAi screen identifies  
764 opposing functions of Snai1 and Snai2 on the Nanog dependency in reprogramming. *Mol*  
765 *Cell* 2014;56:140–52.
- 766 37. Lu Z-Y, Dong R, Li D, Li W-B, Xu F-Q, Geng Y, Zhang Y-S. SNAI1 overexpression induces  
767 stemness and promotes ovarian cancer cell invasion and metastasis. *Oncol Rep*  
768 2012;27:1587–91.
- 769 38. Wittrup A, Lieberman J. Knocking down disease: a progress report on siRNA therapeutics.  
770 *Nat Rev Genet* 2015;16:543–52.
- 771 39. Finlay J, Roberts CM, Dong J, Zink JI, Tamanoi F, Glackin CA. Mesoporous silica  
772 nanoparticle delivery of chemically modified siRNA against TWIST1 leads to reduced  
773 tumor burden. *Nanomedicine Nanotechnol Biol Med* 2015;11:1657–66.
- 774 40. Lu J, Liong M, Zink JI, Tamanoi F. Mesoporous silica nanoparticles as a delivery system for  
775 hydrophobic anticancer drugs. *Small Weinheim Bergstr Ger* 2007;3:1341–6.
- 776 41. Shahin SA, Wang R, Simargi SI, Contreras A, Parra Echavarria L, Qu L, Wen W, Dellinger  
777 T, Unternaehrer J, Tamanoi F, Zink JI, Glackin CA. Hyaluronic acid conjugated  
778 nanoparticle delivery of siRNA against TWIST reduces tumor burden and enhances

- 779 sensitivity to cisplatin in ovarian cancer. *Nanomedicine Nanotechnol Biol Med*  
780 2018;14:1381–94.
- 781 42. Hom C, Lu J, Liong M, Luo H, Li Z, Zink JI, Tamanoi F. Mesoporous silica nanoparticles  
782 facilitate delivery of siRNA to shutdown signaling pathways in mammalian cells. *Small*  
783 *Weinh Bergstr Ger* 2010;6:1185–90.
- 784 43. Zhang S, Balch C, Chan MW, Lai H-C, Matei D, Schilder JM, Yan PS, Huang TH-M,  
785 Nephew KP. Identification and characterization of ovarian cancer-initiating cells from  
786 primary human tumors. *Cancer Res* 2008;68:4311–20.
- 787 44. Liu X, Ory V, Chapman S, Yuan H, Albanese C, Kallakury B, Timofeeva OA, Nealon C,  
788 Dakic A, Simic V, Haddad BR, Rhim JS, et al. ROCK inhibitor and feeder cells induce the  
789 conditional reprogramming of epithelial cells. *Am J Pathol* 2012;180:599–607.
- 790 45. Meng H, Xue M, Xia T, Ji Z, Tarn DY, Zink JI, Nel AE. Use of size and a copolymer design  
791 feature to improve the biodistribution and the enhanced permeability and retention effect of  
792 doxorubicin-loaded mesoporous silica nanoparticles in a murine xenograft tumor model.  
793 *ACS Nano* 2011;5:4131–44.
- 794 46. Wang Z, Lin S, Li JJ, Xu Z, Yao H, Zhu X, Xie D, Shen Z, Sze J, Li K, Lu G, Chan DT-M, et  
795 al. MYC protein inhibits transcription of the microRNA cluster MC-let-7a-1~let-7d via  
796 noncanonical E-box. *J Biol Chem* 2011;286:39703–14.
- 797 47. Wang DJ, Legesse-Miller A, Johnson EL, Collier HA. Regulation of the let-7a-3 promoter by  
798 NF- $\kappa$ B. *PLoS One* 2012;7:e31240.
- 799 48. Careccia S, Mainardi S, Pelosi A, Gurtner A, Diverio D, Riccioni R, Testa U, Pelosi E,  
800 Piaggio G, Sacchi A, Lavorgna S, Lo-Coco F, et al. A restricted signature of miRNAs  
801 distinguishes APL blasts from normal promyelocytes. *Oncogene* 2009;28:4034–40.
- 802 49. Pelosi A, Careccia S, Sagrestani G, Nanni S, Manni I, Schinzari V, Martens JHA, Farsetti A,  
803 Stunnenberg HG, Gentileschi MP, Del Bufalo D, De Maria R, et al. Dual promoter usage as  
804 regulatory mechanism of let-7c expression in leukemic and solid tumors. *Mol Cancer Res*  
805 *MCR* 2014;12:878–89.
- 806 50. O'Hara SP, Splinter PL, Gajdos GB, Trussoni CE, Fernandez-Zapico ME, Chen X-M,  
807 LaRusso NF. NF $\kappa$ B p50-CCAAT/enhancer-binding protein beta (C/EBP $\beta$ )-  
808 mediated transcriptional repression of microRNA let-7i following microbial infection. *J Biol*  
809 *Chem* 2010;285:216–25.
- 810 51. Yang W-H, Lan H-Y, Huang C-H, Tai S-K, Tzeng C-H, Kao S-Y, Wu K-J, Hung M-C, Yang  
811 M-H. RAC1 activation mediates Twist1-induced cancer cell migration. *Nat Cell Biol*  
812 2012;14:366–74.
- 813 52. Brown CE, Starr R, Martinez C, Aguilar B, D'Apuzzo M, Todorov I, Shih C-C, Badie B,  
814 Hudecek M, Riddell SR, Jensen MC. Recognition and killing of brain tumor stem-like  
815 initiating cells by CD8<sup>+</sup> cytolytic T cells. *Cancer Res* 2009;69:8886–93.
- 816 53. Roberts CM, Shahin SA, Wen W, Finlay JB, Dong J, Wang R, Dellinger TH, Zink JI,  
817 Tamanoi F, Glackin CA. Nanoparticle delivery of siRNA against TWIST to reduce drug

- 818 resistance and tumor growth in ovarian cancer models. *Nanomedicine Nanotechnol Biol*  
819 *Med* 2017;13:965–76.
- 820 54. Elliott RL, Blobe GC. Role of transforming growth factor Beta in human cancer. *J Clin Oncol*  
821 *Off J Am Soc Clin Oncol* 2005;23:2078–93.
- 822 55. Al Moustafa A-E, Achkhar A, Yasmeen A. EGF-receptor signaling and epithelial-  
823 mesenchymal transition in human carcinomas. *Front Biosci Sch Ed* 2012;4:671–84.
- 824 56. Hojo N, Huisken AL, Wang H, Chirshhev E, Kim NS, Nguyen SM, Campos H, Glackin CA,  
825 Ioffe YJ, Unternaehrer JJ. Snail knockdown reverses stemness and inhibits tumour growth  
826 in ovarian cancer. *Sci Rep* 2018;8:8704.
- 827 57. Yu F, Yao H, Zhu P, Zhang X, Pan Q, Gong C, Huang Y, Hu X, Su F, Lieberman J, Song E.  
828 let-7 regulates self renewal and tumorigenicity of breast cancer cells. *Cell* 2007;131:1109–  
829 23.
- 830 58. Hahn S, Jackstadt R, Siemens H, Hüntten S, Hermeking H. SNAIL and miR-34a feed-  
831 forward regulation of ZNF281/ZBP99 promotes epithelial-mesenchymal transition. *EMBO J*  
832 2013;32:3079–95.
- 833 59. Li C-F, Chen J-Y, Ho Y-H, Hsu W-H, Wu L-C, Lan H-Y, Hsu DS-S, Tai S-K, Chang Y-C,  
834 Yang M-H. Snail-induced claudin-11 prompts collective migration for tumour progression.  
835 *Nat Cell Biol* 2019;21:251–62.
- 836 60. Kurrey NK, Jalgaonkar SP, Joglekar AV, Ghanate AD, Chaskar PD, Doiphode RY, Bapat  
837 SA. Snail and slug mediate radioresistance and chemoresistance by antagonizing p53-  
838 mediated apoptosis and acquiring a stem-like phenotype in ovarian cancer cells. *Stem*  
839 *Cells Dayt Ohio* 2009;27:2059–68.
- 840 61. Wang Y-Y, Yang Y-X, Zhao R, Pan S-T, Zhe H, He Z-X, Duan W, Zhang X, Yang T, Qiu J-  
841 X, Zhou S-F. Bardoxolone methyl induces apoptosis and autophagy and inhibits epithelial-  
842 to-mesenchymal transition and stemness in esophageal squamous cancer cells. *Drug Des*  
843 *Devel Ther* 2015;9:993–1026.
- 844 62. Liong M, Lu J, Kovochich M, Xia T, Ruehm SG, Nel AE, Tamanoi F, Zink JI. Multifunctional  
845 inorganic nanoparticles for imaging, targeting, and drug delivery. *ACS Nano* 2008;2:889–  
846 96.
- 847 63. Marson A, Levine SS, Cole MF, Frampton GM, Brambrink T, Johnstone S, Guenther MG,  
848 Johnston WK, Wernig M, Newman J, Calabrese JM, Dennis LM, et al. Connecting  
849 microRNA genes to the core transcriptional regulatory circuitry of embryonic stem cells.  
850 *Cell* 2008;134:521–33.
- 851 64. Oshima M, Hasegawa N, Mochizuki-Kashio M, Muto T, Miyagi S, Koide S, Yabata S, Wendt  
852 GR, Saraya A, Wang C, Shimoda K, Suzuki Y, et al. Ezh2 regulates the Lin28/let-7  
853 pathway to restrict activation of fetal gene signature in adult hematopoietic stem cells. *Exp*  
854 *Hematol* 2016;44:282-296.e3.

855

856



857 **Figure Legends:**

858

859 **Figure 1. Growth factor treatment results in increased SNAI1, stemness and decreased**  
860 ***let-7* expression.**

861 MCF-7, PANC-1 were treated with TGFB1; OVCAR8, OVSAHO were treated with EGF. Levels  
862 of control group (cells treated with vehicle control) were normalized to 1; note that values for  
863 RT-qPCR are shown on a log scale.

864 A,B. RT-qPCR analysis for mRNA expression level of *SNAI1* (A) and stemness markers (B,  
865 *LIN28A*, *NANOG*, *POU5F1* and *HMGA2*).

866 C,D. The quantification of Western blot analysis for protein expression of SNAI1 (C) and  
867 HMGA2 (D).

868 E. Left panel: the quantification of number of spheroids per 3000 cells is shown. Right panel:  
869 Phase contrast images of spheroids formed from cells as indicated are presented; in each  
870 panel, the spheroids formed from control group are presented on the left, those from the  
871 treatment group are on the right.

872 F. RT-qPCR analysis for *let-7* miRNA (*let-7a*, *let-7e*, *let-7g* and *let-7i*) expression.

873

874 **Figure 2. *SNAI1* overexpression results in increased stemness and decreased *let-7***  
875 **expression.**

876 Cell lines were transduced with the retroviral expression vector pWZL-Snail or empty vector,  
877 pWZL-Empty in cell lines MCF-7, PANC-1, OVCAR8 and OVSAHO. Levels of control group  
878 (cells transduced with pWZL-Empty) were normalized to 1; note that values for RT-qPCR are  
879 shown on a log scale.

880 A,B. RT-qPCR analysis for mRNA expression of *SNAI1* (A) and stemness markers (B, *LIN28A*,  
881 *NANOG*, *POU5F1*, and *HMGA2*).

882 C,D. The quantification of Western blot analysis for protein expression of SNAI1 (C) and  
883 HMGA2 (D).

884 E. The quantification of number of spheroids formed per 3000 cells as indicated.

885 F. RT-qPCR analysis for *let-7* miRNA (*let-7a*, *let-7e*, *let-7g* and *let-7i*) expression.

886

887 **Figure 3. *SNAI1* knockdown reverses stemness and restores *let-7* expression.**

888 Mesoporous silica nanoparticles coated with hyaluronic acid (HA-MSN) were used to deliver  
889 siRNA (siSnail and siControl) in MCF-7, PANC-1, OVCAR8 and OVSAHO. Levels of control

890 group (cells treated with siControl) were normalized to 1; note that values for RT-qPCR are  
891 shown on a log scale.

892 A,B. RT-qPCR analysis for mRNA expression of *SNAI1* (A) and stemness markers (B, *LIN28A*,  
893 *NANOG*, *POU5F1*, and *HMGA2*).

894 C,D. The quantification of Western blot analysis for protein expression of SNAI1 (C) and  
895 HMGA2 (D).

896 E. The quantification of number of spheroids formed per 3000 cells as indicated.

897 F. RT-qPCR analysis for *let-7* miRNA (*let-7a*, *let-7e*, *let-7g* and *let-7i*) expression.

898

899 **Figure 4. *SNAI1* knockdown reduces stemness in patient-derived cells *in vitro*.**

900 HA-MSN were used to deliver siRNA (siSnail and siControl) in PDX cells *in vitro*. Levels of  
901 control group (cells treated with siControl) were normalized to 1; note that values for RT-qPCR  
902 and Western blot are shown on a log scale.

903 A,B. RT-qPCR analysis for mRNA expression of *SNAI1* (A) and stemness markers (B, *LIN28A*,  
904 *NANOG*, *POU5F1*, and *HMGA2*).

905 C,D. The quantification of Western blot analysis for protein expression of SNAI1 (C) and  
906 HMGA2 (D).

907 E. The quantification of number of spheroids per 3000 cells formed from PDX6 *in vitro*.

908 F. RT-qPCR analysis for *let-7* miRNA (*let-7a*, *let-7e*, *let-7g* and *let-7i*) expression.

909

910 **Figure 5. *SNAI1* knockdown *in vivo* reduces stemness gene expression and tumor  
911 burden.**

912 HA-MSN were used to deliver siRNA (siSnail and siControl) via IV injection to orthotopic PDX *in*  
913 *vivo*. Tumor samples were harvested and analyzed at necropsy. Levels of control group (cells  
914 treated with siControl) were normalized to 1; note that values for RT-qPCR are shown on a log  
915 scale.

916 A,B. RT-qPCR analysis for mRNA expression of *SNAI1* (A) and stemness markers (B, *LIN28A*,  
917 *NANOG*, *POU5F1*, and *HMGA2*) in tumors.

918 C,D. The quantification of Western blot analysis for protein expression of SNAI1 (C) and  
919 stemness markers (D, *LIN28A* and *HMGA2*) in tumors.

920 E. RT-qPCR analysis for *let-7* miRNA (*let-7a*, *let-7e*, *let-7g* and *let-7i*) expression in tumors.

921 F. Left panel: Representative images of xenograft mice. siControl (upper) and siSnail  
922 knockdown (lower). Right panel: Quantitation of bioluminescence at primary sites over six  
923 weeks. X axis, days; Y axis, total flux in photons/second relative to day 1.

924

925 **Figure 6. *SNAI1* represses *let-7* promoters.**

926 A. Schematic representation of the promoter region of *let-7i* (upper) and reporter constructs  
927 used in luciferase assays (lower diagrams). E1, E2, E3: E-boxes (sequence: CANNTG); MU:  
928 mutated E-boxes; TSS: transcription start site

929 B. For luciferase assays, HEK293T cells were co-transfected with two plasmids: 1) *let-7*  
930 promoter luciferase (*let-7i*, *let-7a1/d/f1*, *let-7a3/b*, *let-7c*), and 2) either *SNAI1* (constitutively  
931 expressed, gray bars) or empty vector (black bars). Luminescence activity was measured 48  
932 hours thereafter.

933 C. HEK293T cells were co-transfected with either *let-7i* lucB or *let-7i* mlucB with or without  
934 *SNAI1*. Luminescence was measured 24 hours later.

935

**Figure 1**

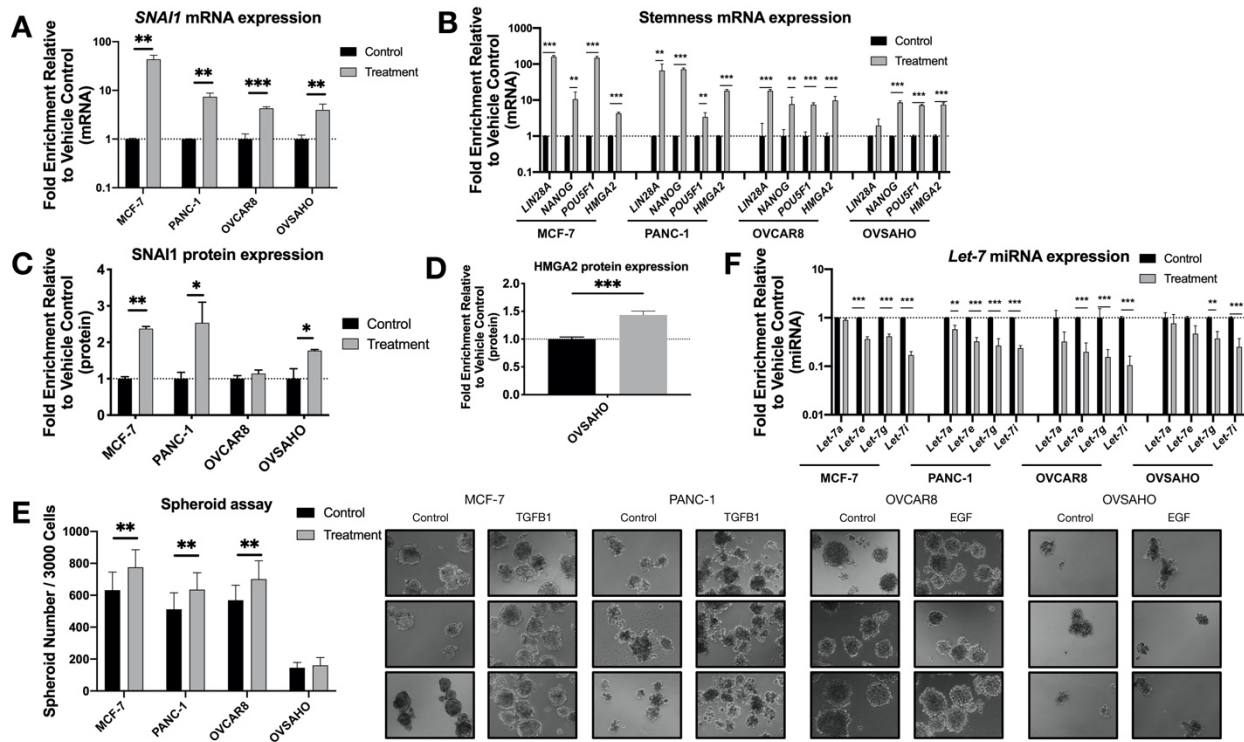

Figure 2

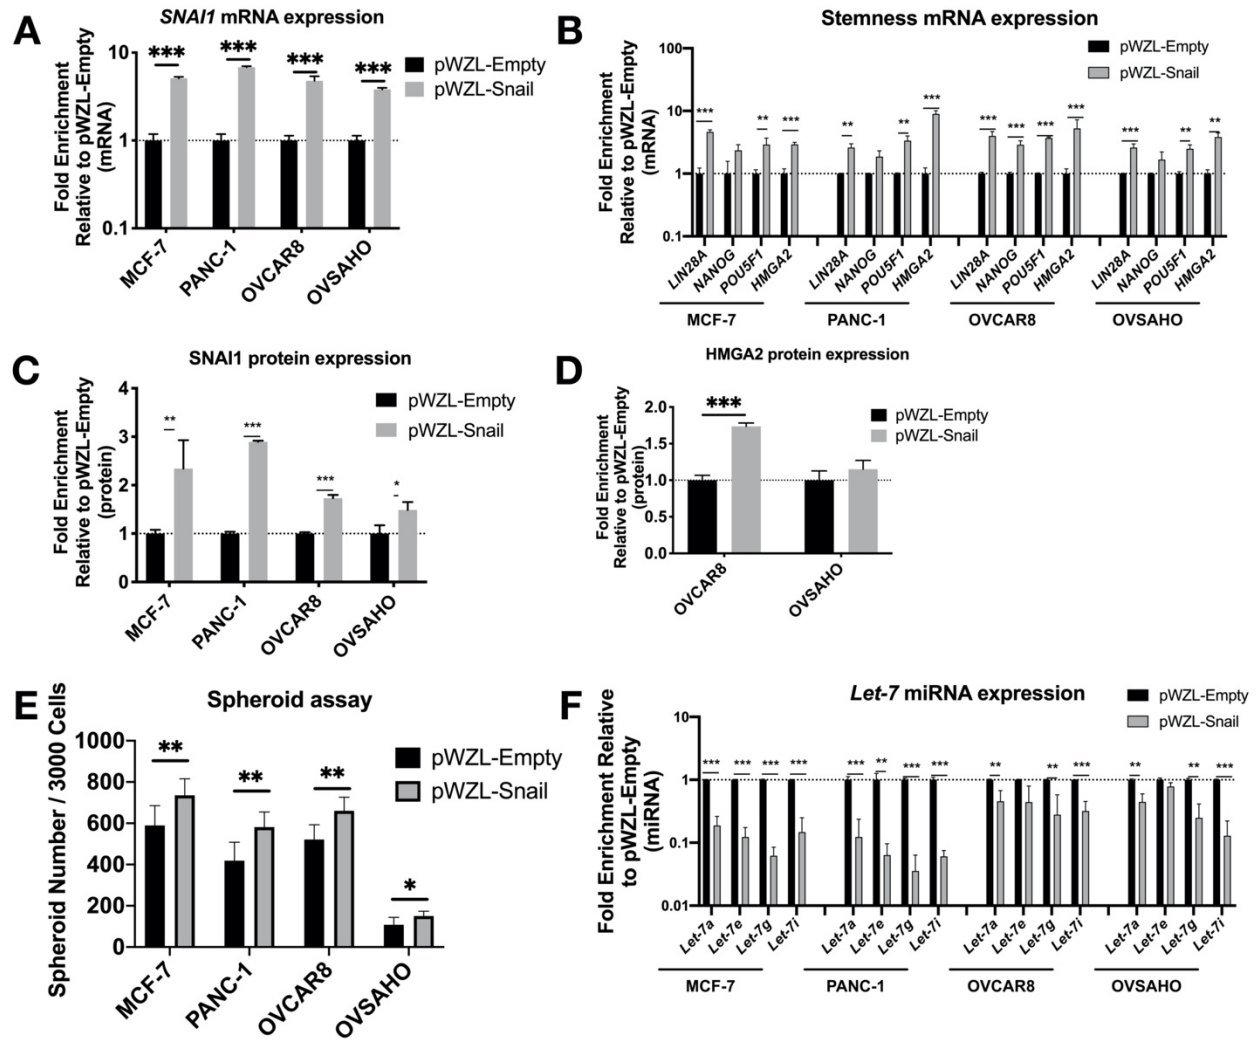

**Figure 3**

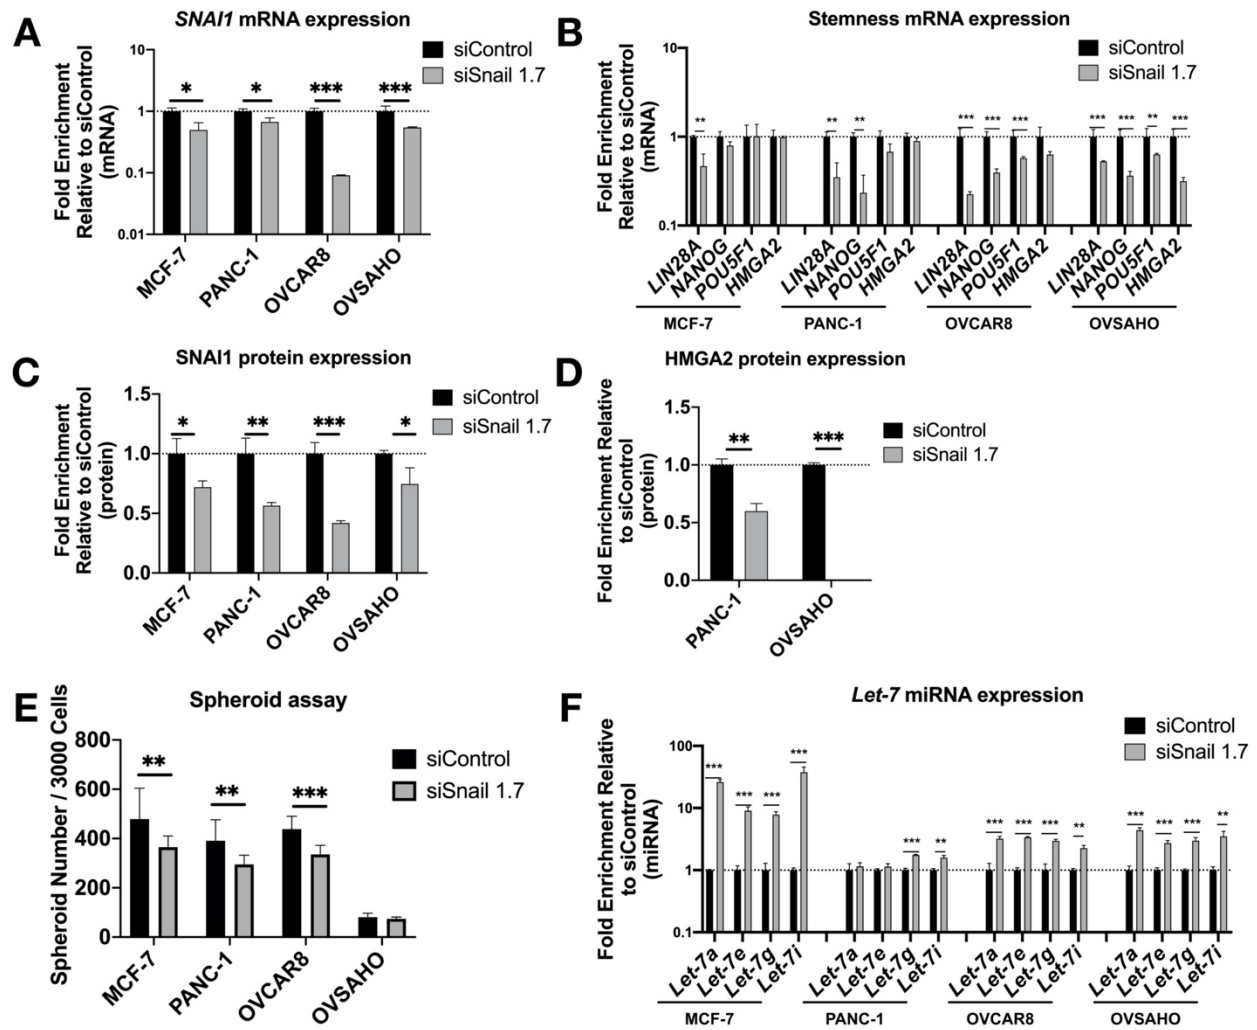

Figure 4

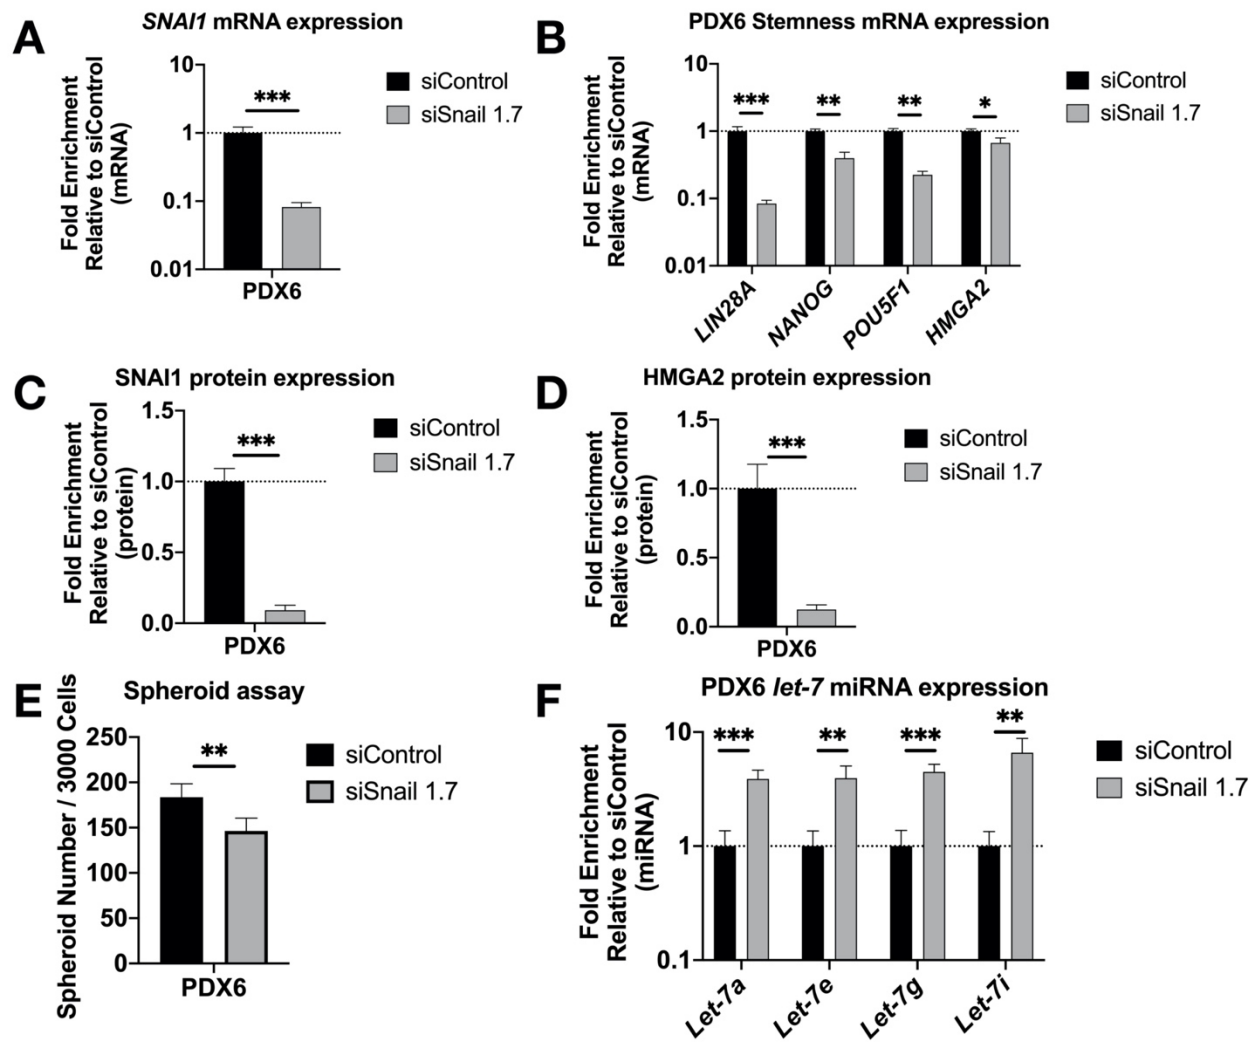

Figure 5

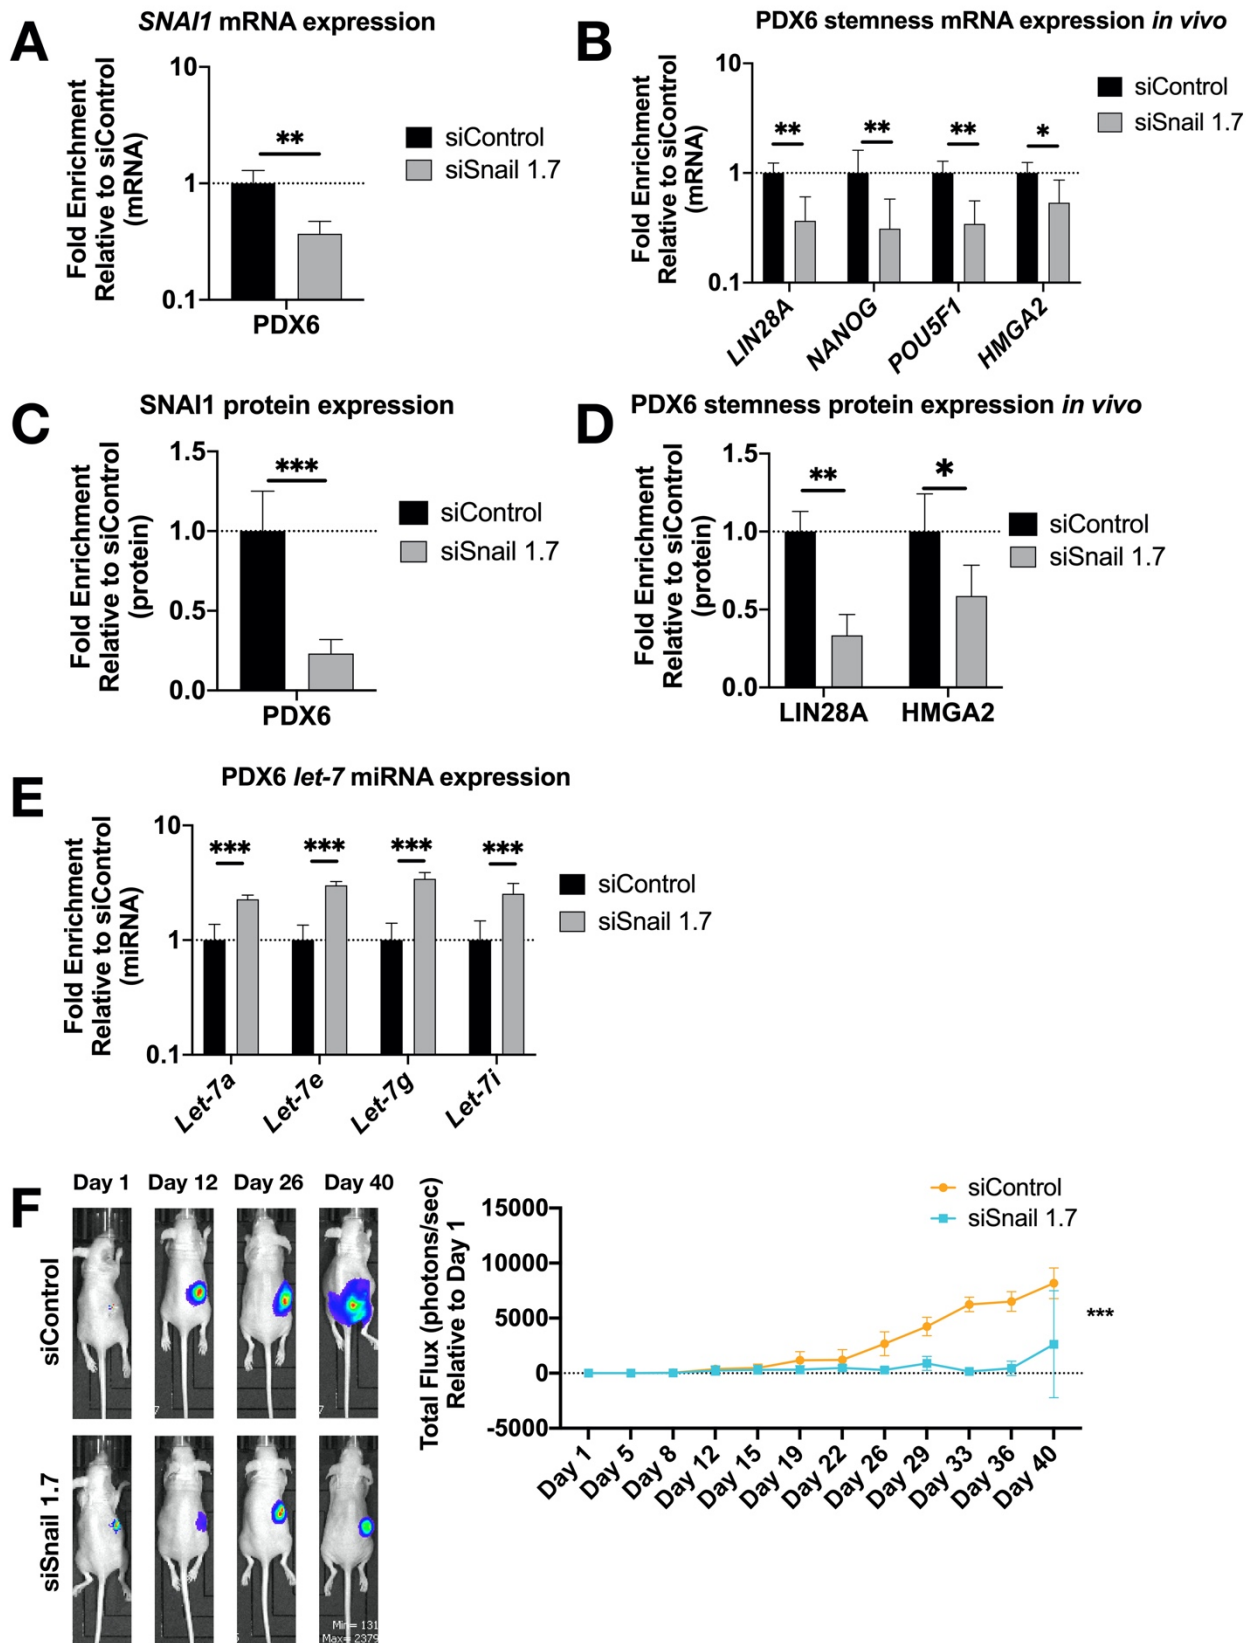



Figure 6

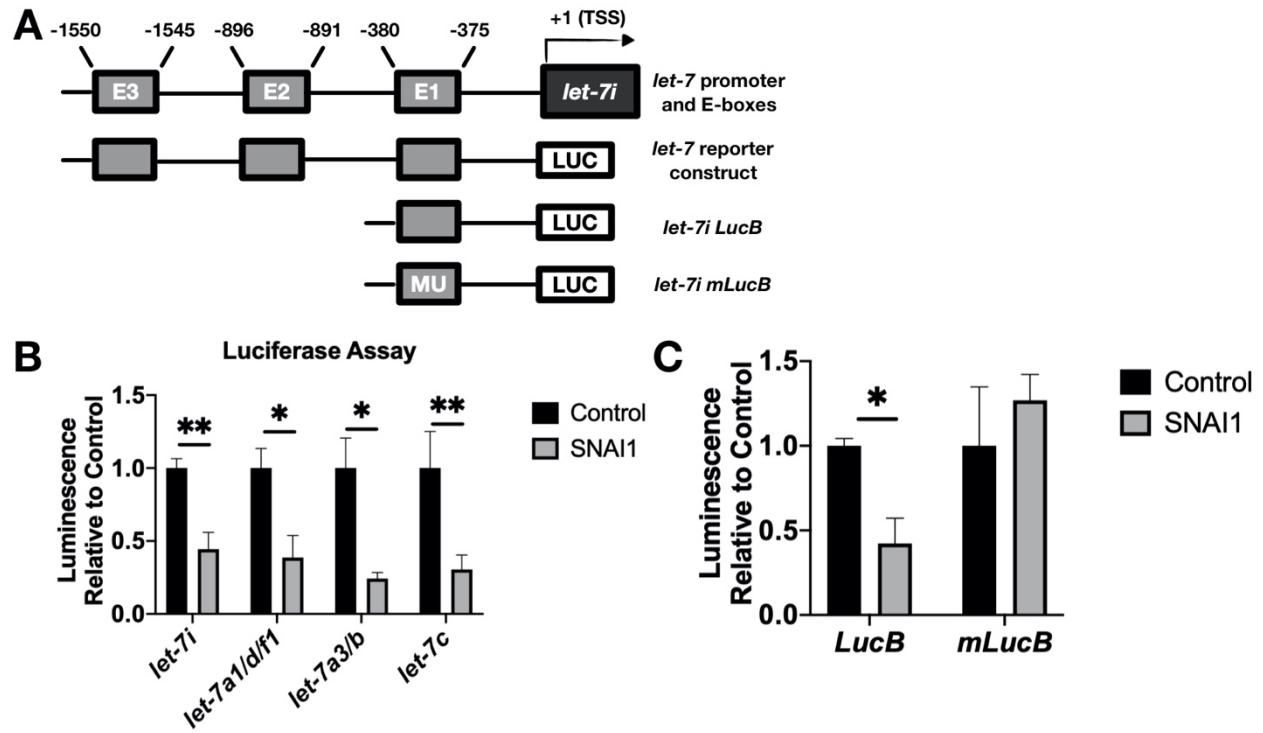

Source: http://biorxiv.org/content/10.1101/2020.11.04.368688v1.full.pdf
